# Supplementary material for: Scalable Design of Paired CRISPR Guide RNAs for Genomic Deletion
Source: PubMed Central journal article supplement (PMC5333799; doi:10.1371/journal.pcbi.1005341), 2017-03-02

## Primer efficiency calculations for experiments on TFRC promoter.

| Primer                   | Amplification efficiency : $E = 10^{(-1/\text{slope})}$ |            |                |
|--------------------------|---------------------------------------------------------|------------|----------------|
|                          | slopes (m)                                              | E          | Efficiency (%) |
| TFRC_B out F/TFRC_B in R | -3.22                                                   | 2.04536742 | 105            |
| GAPDH F/R                | -3.27                                                   | 2.02005019 | 102            |
| LdhA F/R                 | -3.22                                                   | 2.04395923 | 104            |

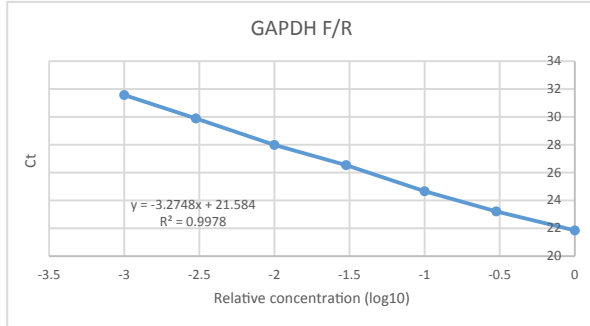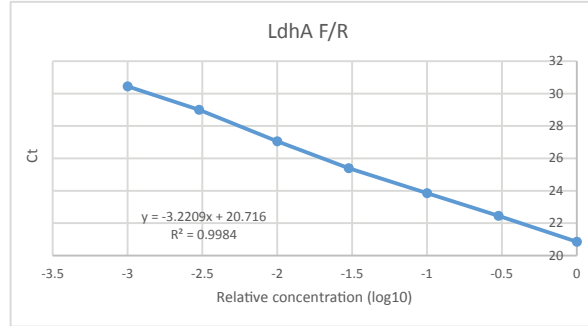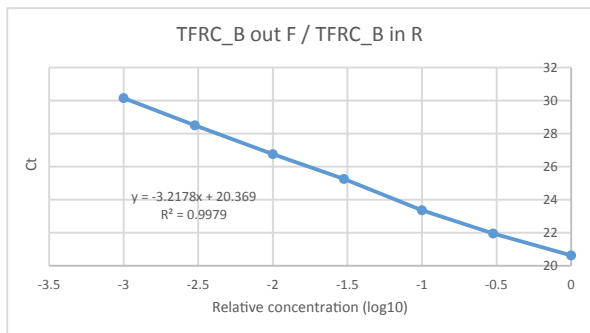

## Primer efficiency calculations for experiments on MALAT1 locus.

Efficiency estimated from log linear fit to the red, linear region.

| Primer                | Amplification efficiency : $E = 10^{(-1/\text{slope})}$ |            |                |
|-----------------------|---------------------------------------------------------|------------|----------------|
|                       | slope (m)                                               | E          | Efficiency (%) |
| Enhancer in F / out R | -2.99                                                   | 2,15997219 | 116            |
| Exon in F / out R     | -3.27                                                   | 2,02213617 | 102            |
| GAPDH F/R             | -3,09                                                   | 2,10680624 | 111            |
| LdhA F/R              | -2,9                                                    | 2,21221629 | 121            |

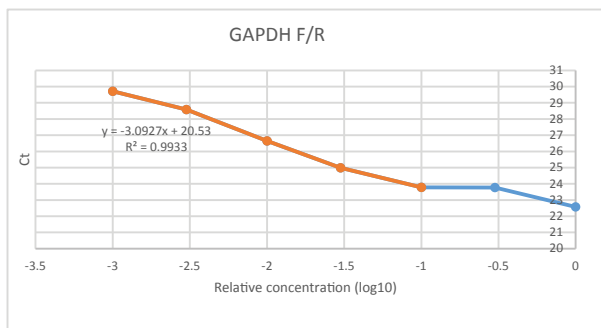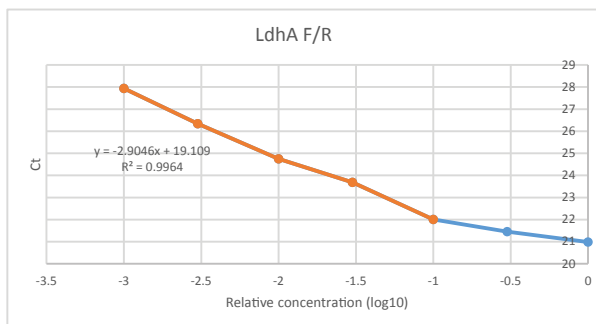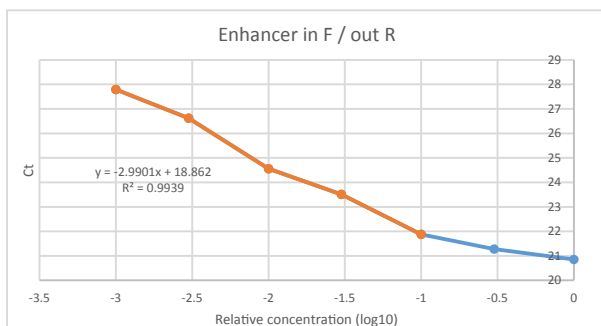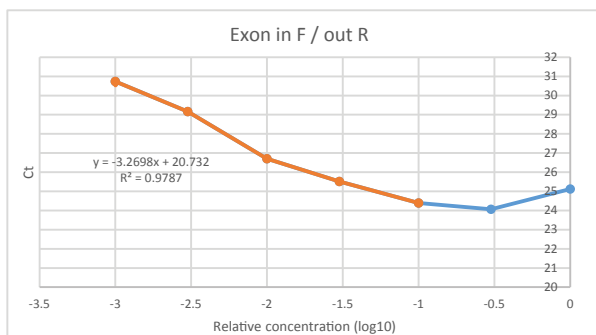

Supplement: pcbi.1005341.s004.pdf [file pcbi.1005341.s004.pdf]
