# Supplementary material for: Scalable Design of Paired CRISPR Guide RNAs for Genomic Deletion
Source: PubMed Central journal article supplement (PMC5333799; doi:10.1371/journal.pcbi.1005341), 2017-03-02

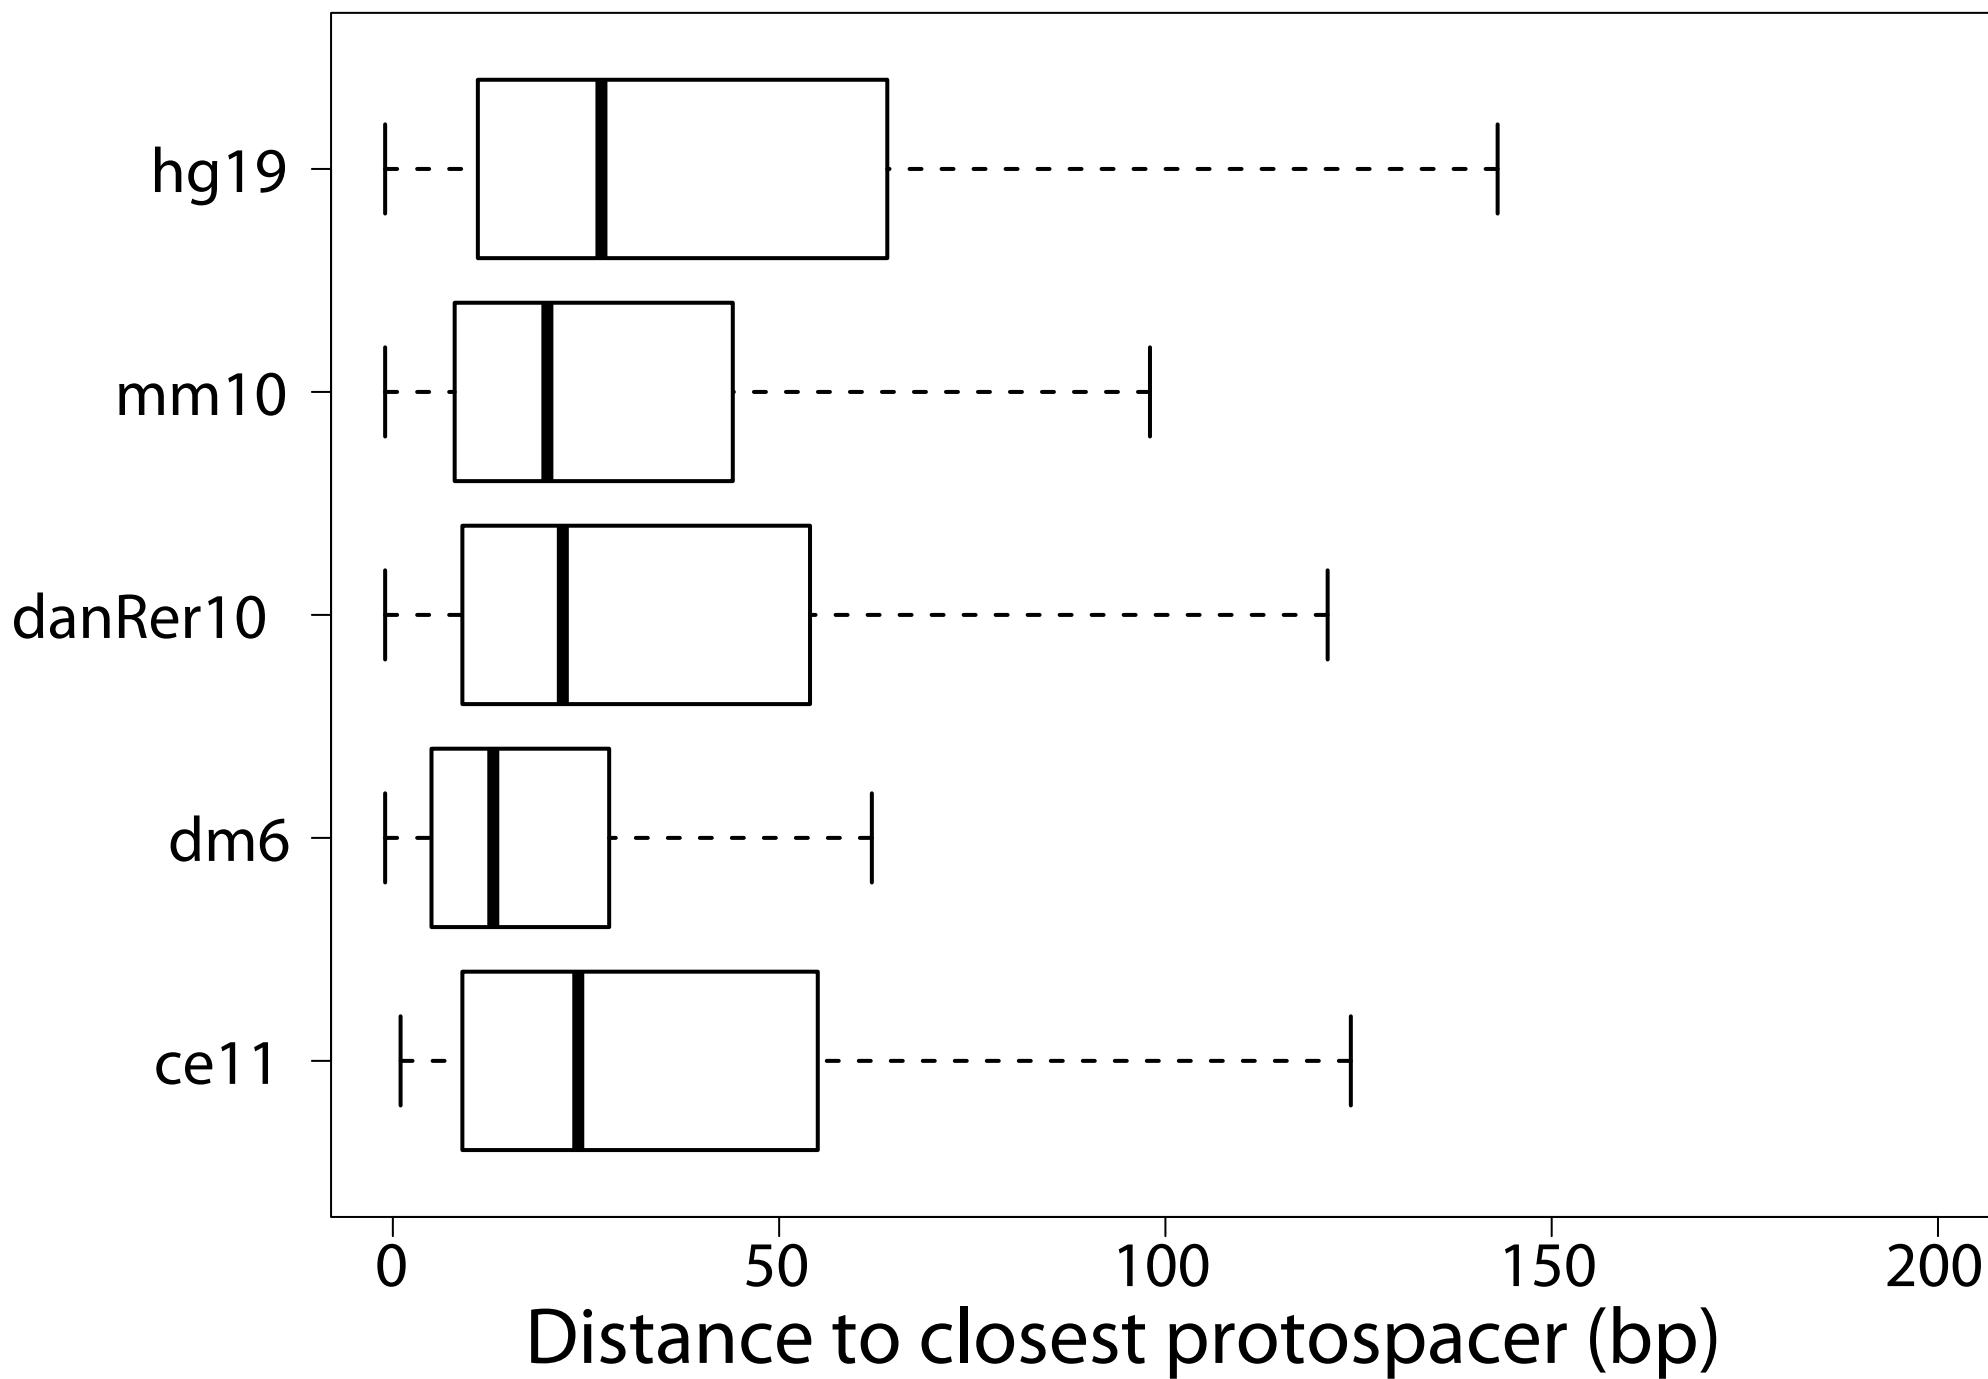

Supplement: pcbi.1005341.s007.pdf [file pcbi.1005341.s007.pdf]
